# Supplementary material for: Right Ventricular Septal Versus Apical Pacing: Long-Term Incidence of Heart Failure and Survival
Source: MDPI journal article supplement (doi:10.3390/jcdd9120444), 2022-12-09
Supplement: s1 [file s1]

**Table S1.** Univariate and multivariate analysis of predictors of the secondary outcome.

| Variable                 | Univariate Analysis |                | Multivariate Analysis |                |
|--------------------------|---------------------|----------------|-----------------------|----------------|
|                          | HR 95% CI           | <i>p</i> Value | HR 95% CI             | <i>p</i> Value |
| Age (years)              | 1.11 (1.08–1.15)    | <0.001         | 1.11 (1.06–1.15)      | <0.001         |
| Men                      | 0.90 (0.58–1.38)    | 0.62           | 1.40 (0.74–2.62)      | 0.30           |
| Hypertension             | 1.50 (0.86–2.62)    | 0.16           | -                     | -              |
| Dyslipidemia             | 0.72 (0.47–1.11)    | 0.13           | -                     | -              |
| Diabetes mellitus        | 1.39 (0.89–2.16)    | 0.15           | -                     | -              |
| Smoker                   | 0.84 (0.49–1.44)    | 0.53           | -                     | -              |
| Coronary artery disease  | 1.40 (0.84–2.33)    | 0.20           | -                     | -              |
| Heart failure            | 2.38 (1.55–3.67)    | <0.001         | 1.03 (0.52–2.04)      | 0.94           |
| Atrial fibrillation      | 1.09 (0.70–1.68)    | 0.71           | -                     | -              |
| Chronic kidney disease   | 2.34 (1.50–3.65)    | <0.001         | 1.29 (0.63–2.62)      | 0.49           |
| Hemoglobin (g/dL)        | 0.79 (0.70–0.89)    | <0.001         | -                     | -              |
| Serum creatinine (mg/dL) | 1.18 (1.02–1.38)    | 0.03           | -                     | -              |
| LVEF <50%                | 1.74 (0.98–3.09)    | 0.06           | 1.45 (0.47–4.49)      | 0.58           |
| RV systolic dysfunction  | 2.66 (1.15–6.16)    | 0.02           | 2.97 (0.51–17.14)     | 0.22           |
| Severe AS                | 2.80 (0.87–8.98)    | 0.08           | -                     | -              |
| Significant MS           | 1.60 (0.22–11.54)   | 0.64           | -                     | -              |
| Severe MR                | 1.47 (0.81–2.79)    | 0.65           | -                     | -              |
| Severe TR                | 1.01 (0.14–7.30)    | 0.99           | -                     | -              |
| RVA pacing               | 2.33 (1.16–4.55)    | 0.02           | 1.74 (0.71–4.24)      | 1.74           |
| RV pacing percentage     | 1.01 (1.00–1.01)    | 0.15           | 1.00 (0.99–1.01)      | 0.46           |

AS: aortic stenosis; CI: confidence interval; HR: hazard ratio; LVEF: left ventricular ejection fraction; MR: mitral regurgitation; MS: mitral stenosis; RV: right ventricular; RVA: right ventricular apical; SD: standard deviation; TR: tricuspid regurgitation.
